# Supplementary material for: Evaluation of a solid matrix for collection and ambient storage of RNA from whole blood
Source: PubMed Central journal article supplement (PMC4030268; doi:10.1186/1472-6890-14-22), 2014-05-13

# (B) RSM Baseline

Subject 1

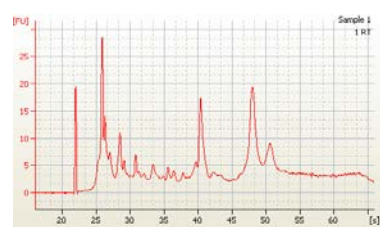

Subject 2

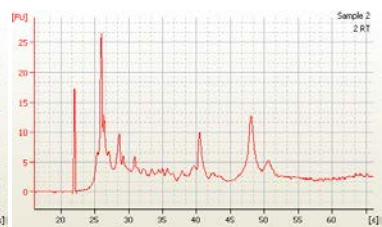

Subject 3

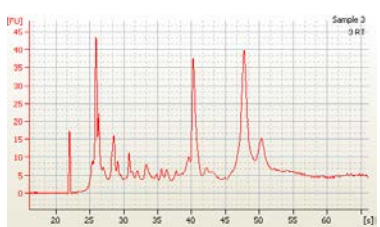

Subject 4

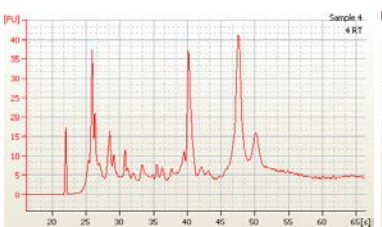

Subject 5

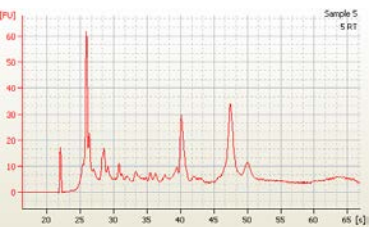

Subject 6

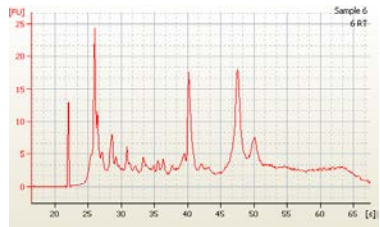

Subject 7

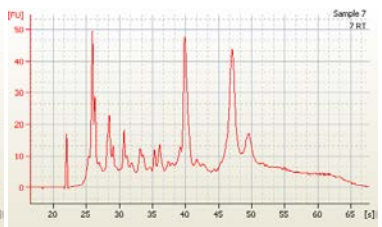

Subject 8

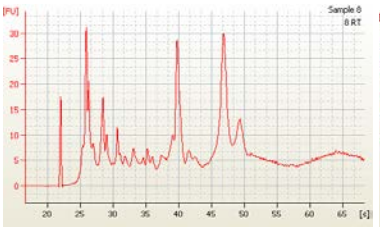

Subject 9

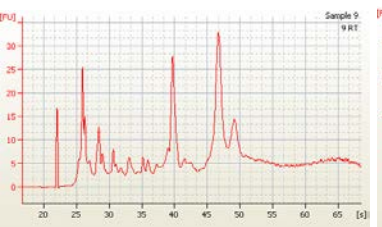

Subject 10

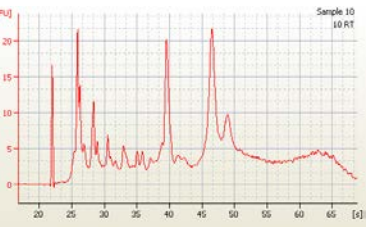

Subject 11

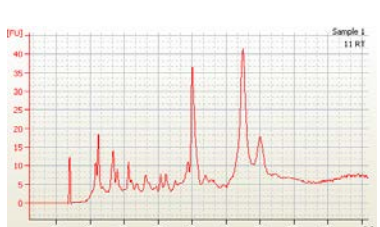

Subject 12

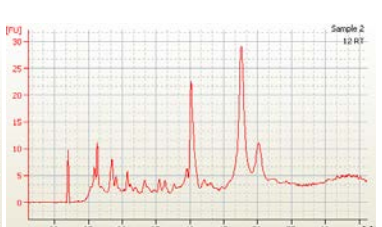

Subject 13

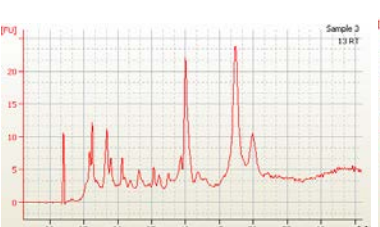

Subject 14

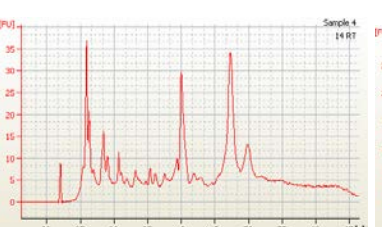

Subject 15

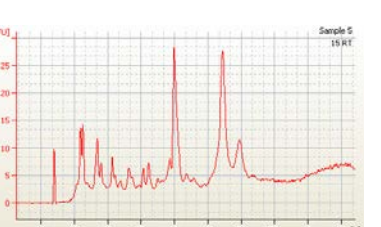

Subject 16

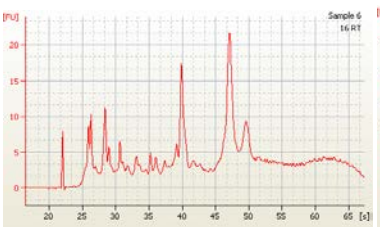

Subject 17

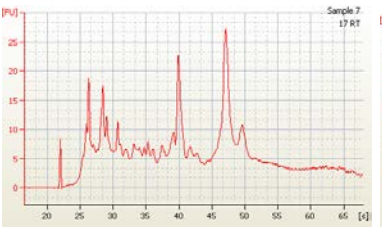

Subject 18

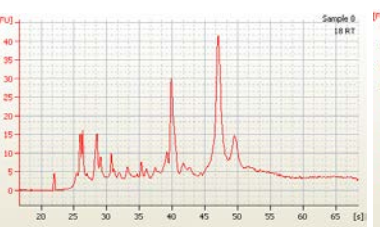

Subject 19

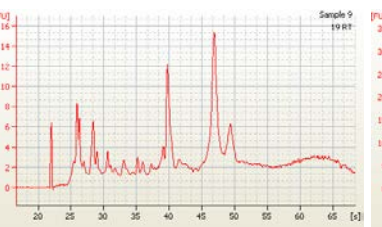

Subject 20

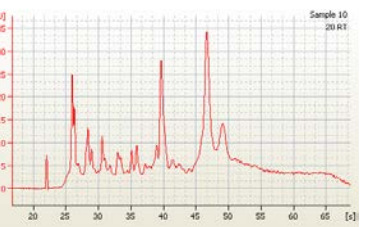

Subject 21

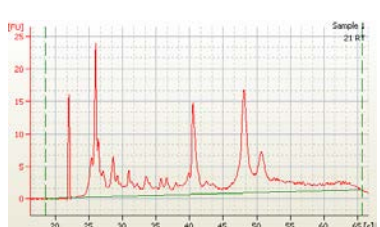

Subject 22

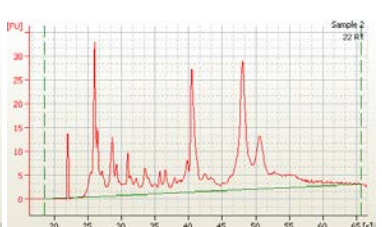

Subject 23

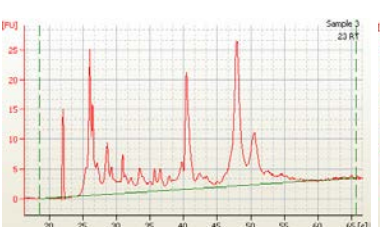

Subject 24

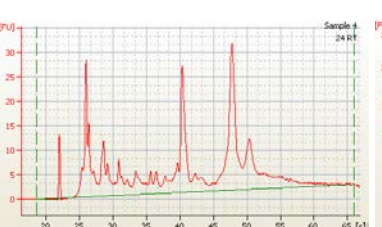

Subject 25

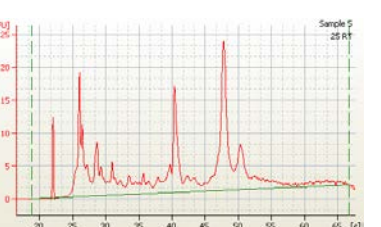

# (C) 31-ETF Baseline

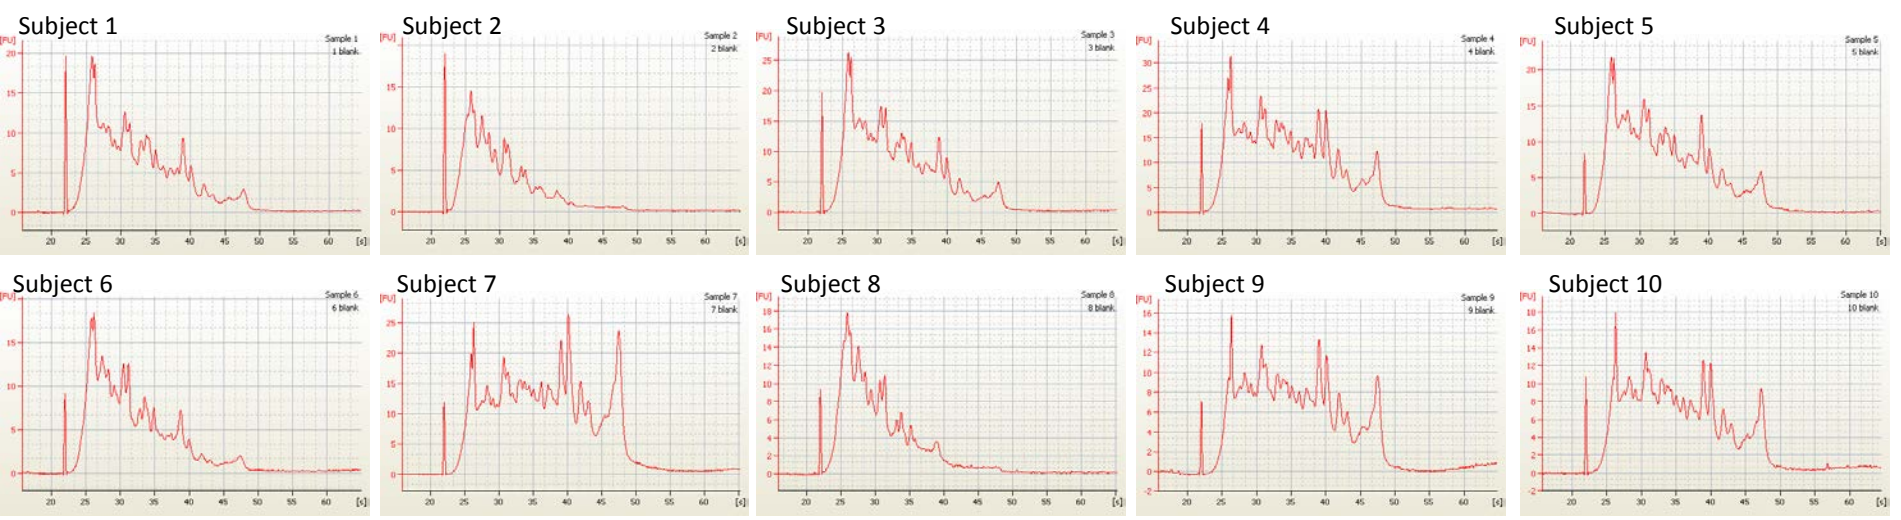

# (D) RSM 37 °C

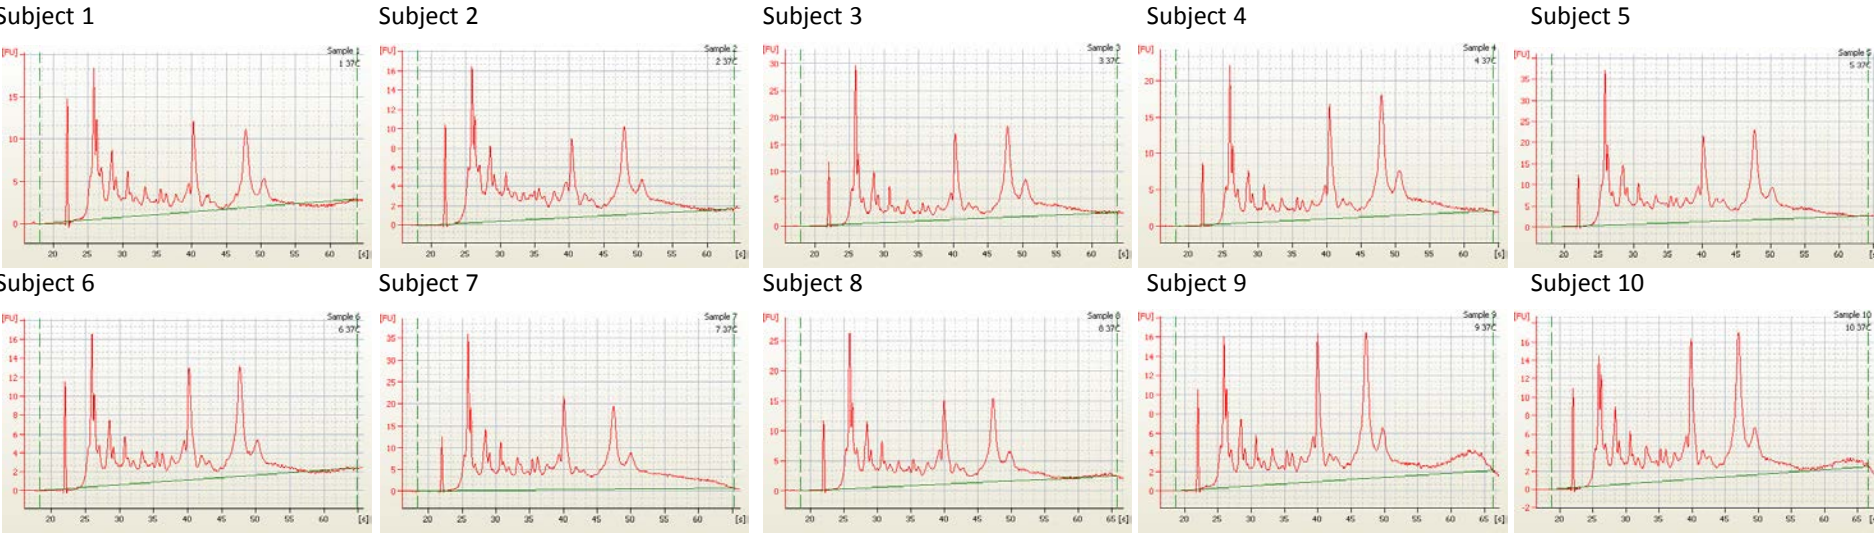

# (E) RSM 6 Days

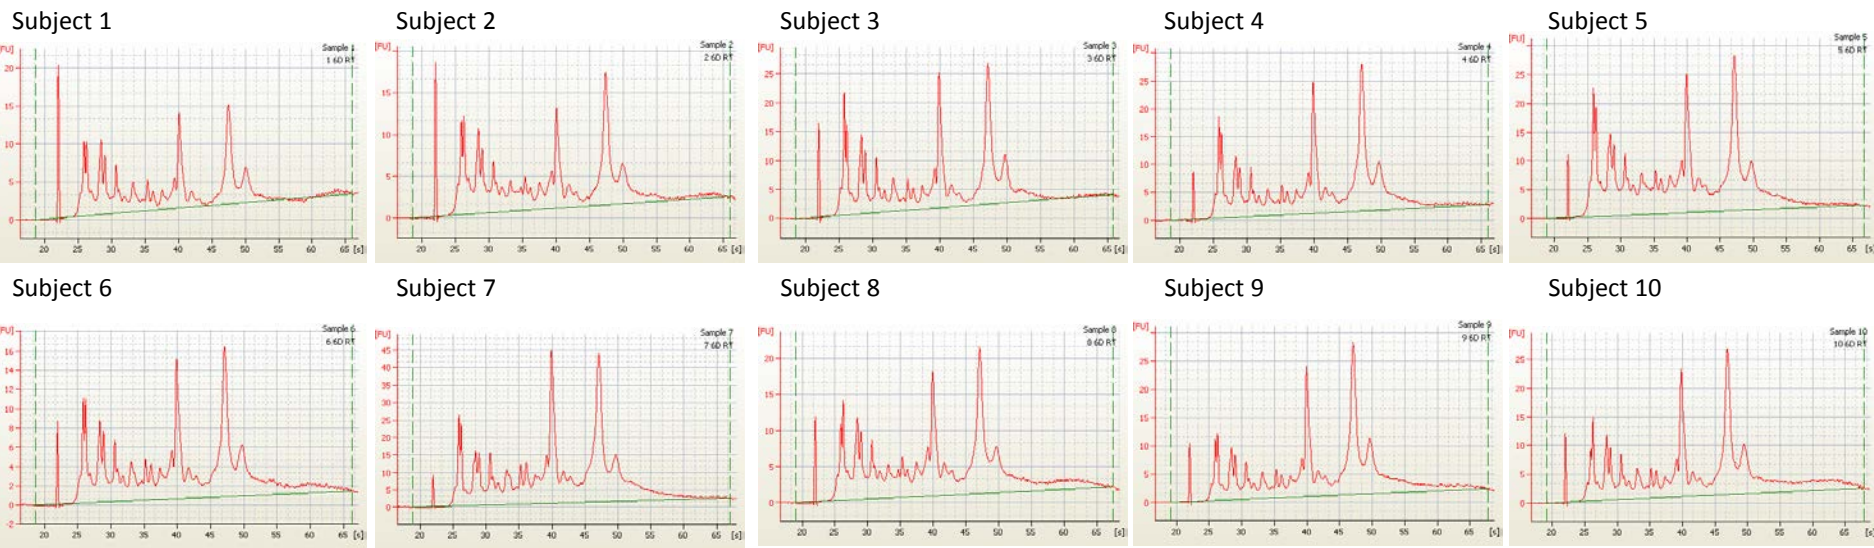

# (F) PAXgene Controls Baseline

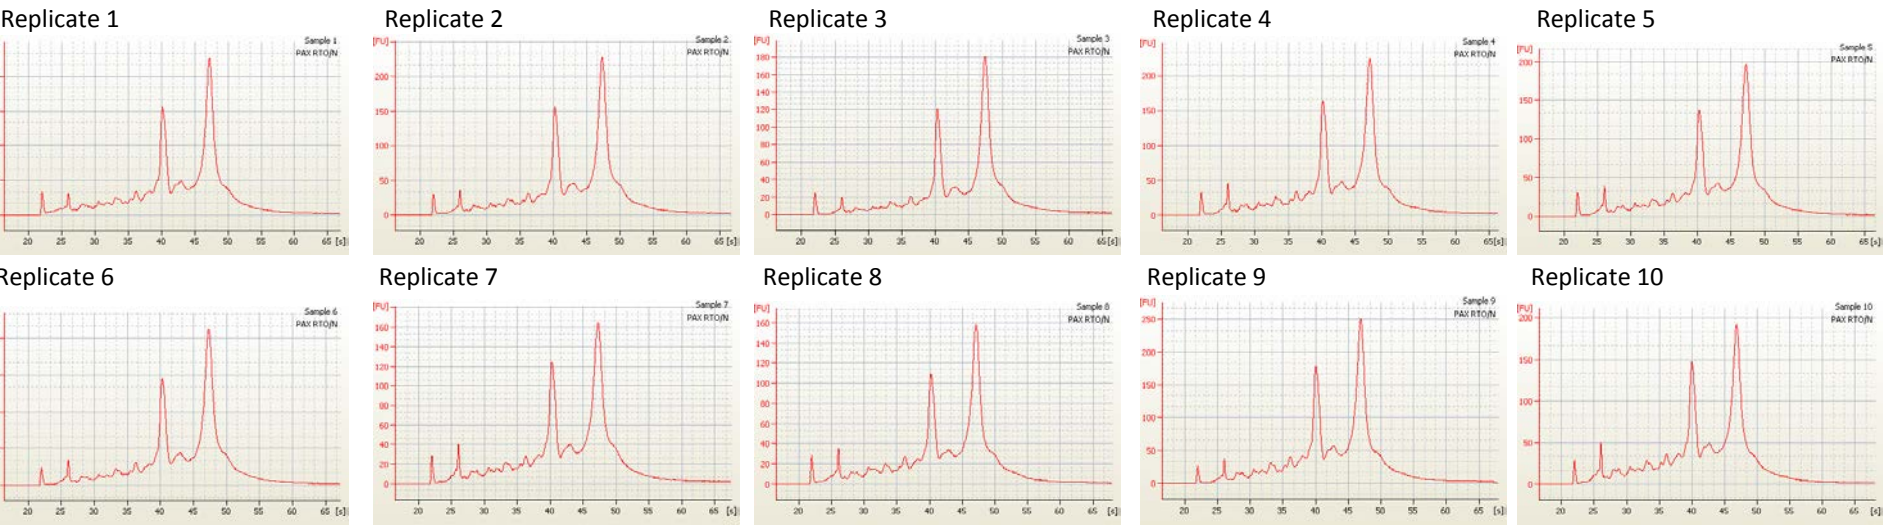

# (G) PAXgene Controls 37 °C

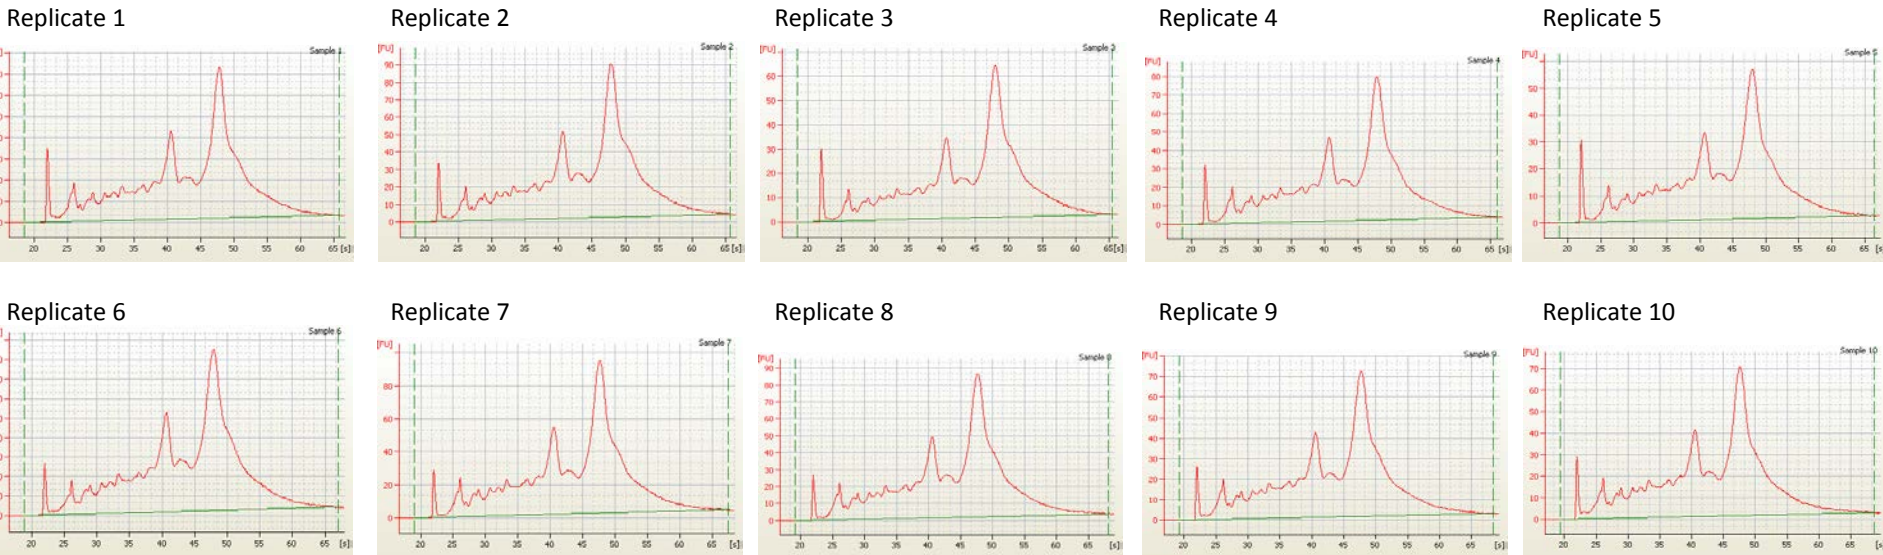

# (H) PAXgene Controls 6 Days

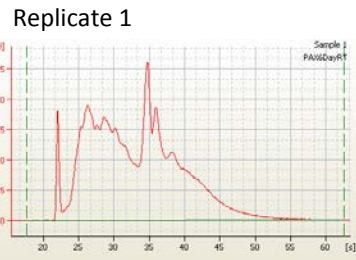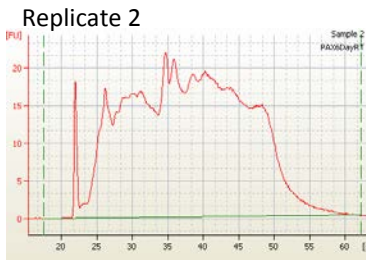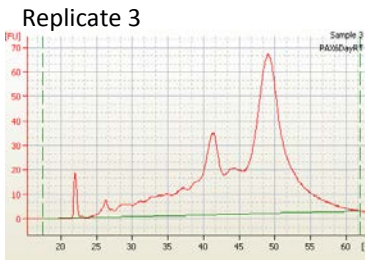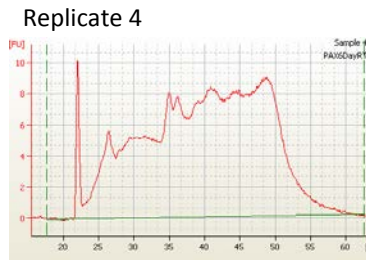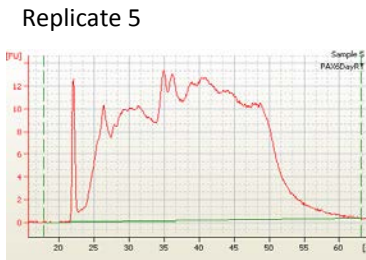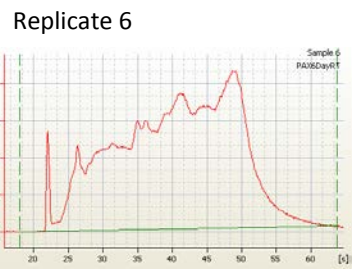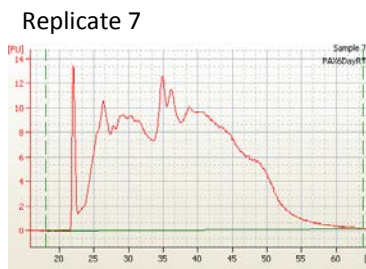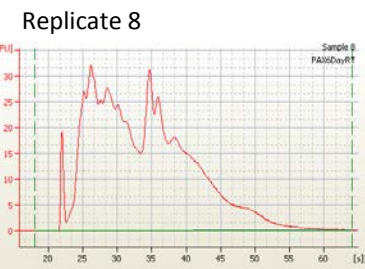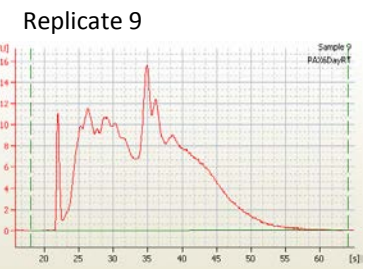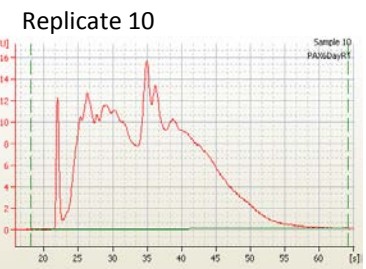

Supplement: 1472-6890-14-22-S3.pdf [file 1472-6890-14-22-S3.pdf]
