# Supplementary material for: Evaluation of a solid matrix for collection and ambient storage of RNA from whole blood
Source: PubMed Central journal article supplement (PMC4030268; doi:10.1186/1472-6890-14-22), 2014-05-13

Supplementary Figure 1

(A)

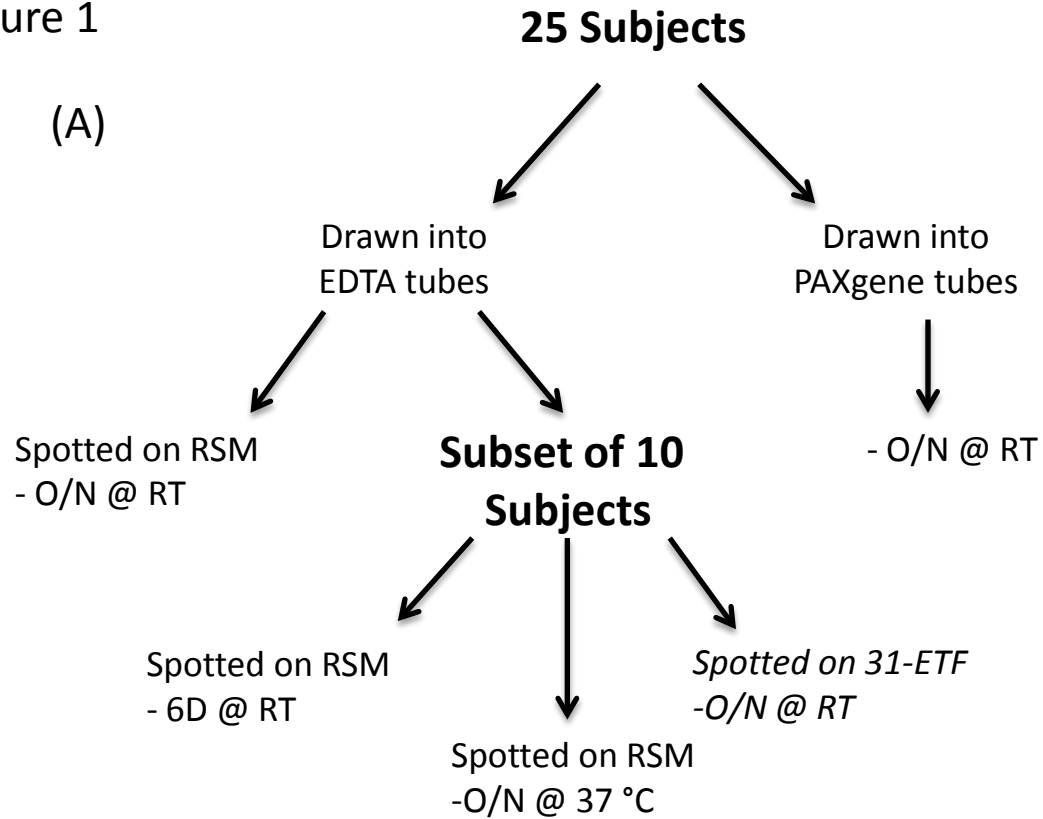

(B)

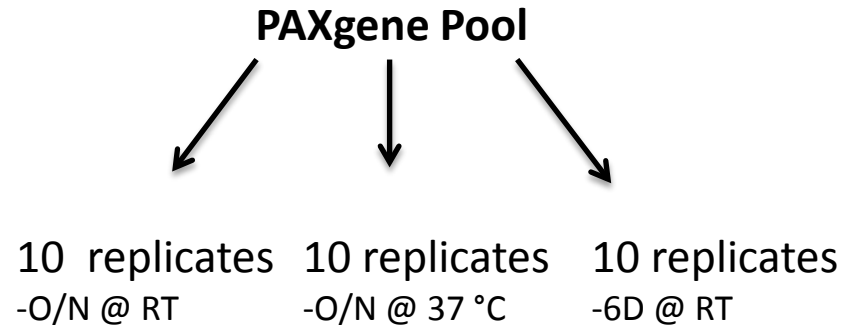

Supplement: 1472-6890-14-22-S2.pdf [file 1472-6890-14-22-S2.pdf]
